# Supplementary material
Source: PubMed Central journal article supplement (PMC2064563)
Supplement: jcellbiol_jcb.200608061_2.pdf [file jcellbiol_jcb.200608061_2.pdf]

# Hesselson et al., <http://www.jcb.org/cgi/content/full/jcb.200608061/DC1>

## Construct details

Details are given below in the format transgene: FBL-1 amino acids included (aa X–X), plasmid number (pJKXXXX), extrachromosomal array (*qExXXX*), extrachromosomal array in the *fbl-1(q771)* genetic background (JKXXXX), and extrachromosomal array in *fbl-1(q771) gon-1(q518)* genetic background (JKXXXX).

VENUS:FBL-1C: aa 1–712, pJK1028, *qEx534*, JK3721 (*q771*), and JK3685 (*q771q518*). VENUS::FBL-1D: aa 1–728, pJK1112, *qEx564*, JK3875 (*q771*), and JK3809 (*q771q518*). VENUS::FBL-1C(EGF2D): aa 1–751, pJK1113, *qEx566*, and JK3959 (*q771q518*). VENUS::FBL-1D(EGF2C): aa 1–689, pJK1026, *qEx532*, JK3722 (*q771*), and JK3683 (*q771q518*). VENUS::FBL-1C(-AT): aa 1–20, 131–712, pJK1035, *qEx525*, JK3720 (*q771*), and JK3676 (*q771q518*). VENUS::FBL-1C(-EGF): aa 1–130, 564–712, pJK1120, *qEx572*, JK3876 (*q771*), and JK3815 (*q771q518*). VENUS::FBL-1C(-FIB): aa 1–563, pJK1066, *qEx549*, JK3769 (*q771*), and JK3735 (*q771q518*). VENUS::EGF1-9: aa 1–20, 131–563, pJK1136, *qEx586*, JK3893 (*q771*), and JK3881 (*q771q518*). VENUS::EGF1-4+: aa 1–20, 131–385, pJK1033, *qEx523*, JK3766 (*q771*), and JK3674 (*q771q518*). VENUS::EGF1-2C+: aa 1–20, 131–286, pJK1111, *qEx562*, JK3874 (*q771*), and JK3807 (*q771q518*). VENUS::EGF1-2C: aa 1–20, 131–240, pJK1140, *qEx590*, JK3895 (*q771*), and JK3885 (*q771q518*). VENUS::EGF2C+: aa 1–20, 194–286, pJK1144, *qEx594*, JK3898 (*q771*), and JK3889 (*q771q518*). VENUS::CTERM: aa 1–20, 350–712, pJK1063, *qEx543*, JK3767 (*q771*), and JK3732 (*q771q518*). VENUS::CTERM(EGF2C): aa 1–20, 350–712, EGF2C inserted at aa 475–476, pJK1146, *qEx596*, JK3960 (*q771*), and JK3891 (*q771q518*).
